# Supplementary material for: Voltammetric Sensor Based on SeO2 Nanoparticles and Surfactants for Indigo Carmine Determination
Source: MDPI journal article supplement (doi:10.3390/s22093224), 2022-04-22
Supplement: s1 [file s1]

## Electronic supplementary data

### Voltammetric Sensor Based on SeO<sub>2</sub> Nanoparticles and Surfactants for Indigo Carmine Determination

Liya Kavieva and Guzel Ziyatdinova

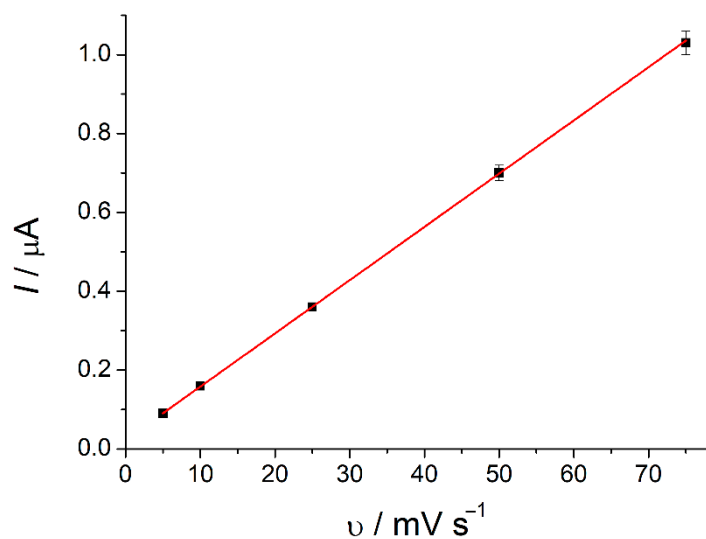

(a)

(b)

**Figure S1.** Effect of potential scan rate on the oxidation currents of 50  $\mu\text{M}$  indigo carmine at the SeO<sub>2</sub>–CPB/GCE in phosphate buffer pH 5.0: (a) Plot of oxidation current vs. potential scan rate; (b) Plot of the Napierian logarithm of oxidation current vs. Napierian logarithm of the potential scan rate.

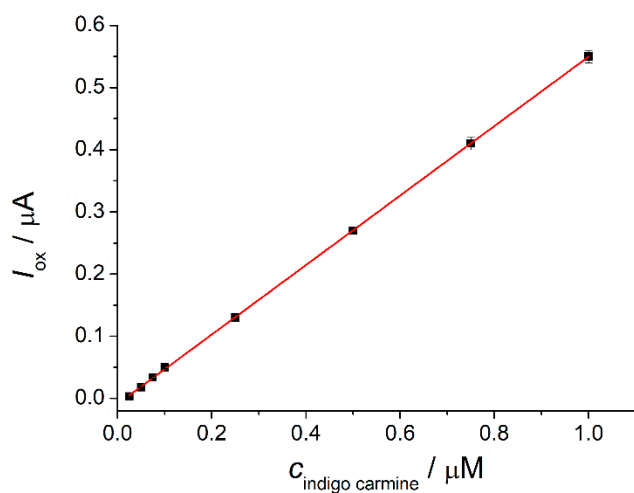

(a)

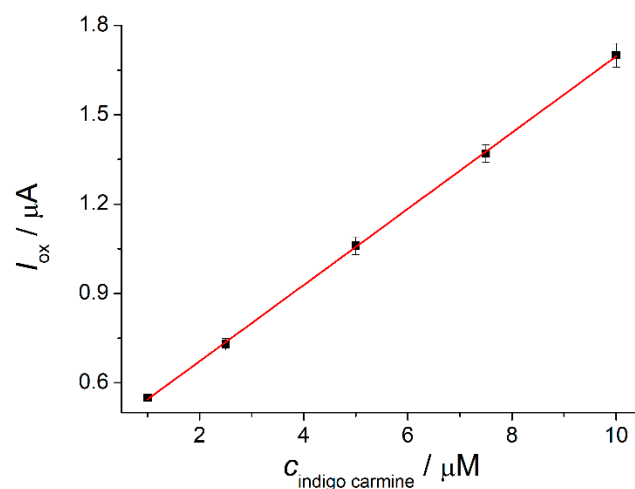

(b)

**Figure S2.** Calibration plots of indigo carmine at the the SeO<sub>2</sub>–CPB/GCE in phosphate buffer pH 5.0: (a) in the concentration range of 0.025–1.0  $\mu\text{M}$ ; (b) in the concentration range of 1.0–10  $\mu\text{M}$ .
